# Supplementary material for: Metabolomic Profiles of Mouse Tissues Reveal an Interplay between Aging and Energy Metabolism
Source: Metabolites. 2021 Dec 26;12(1):17. doi: 10.3390/metabo12010017 (PMC8779655; doi:10.3390/metabo12010017)
Supplement: Supplementary file 1 [file metabolites-12-00017-s001.zip › metabolites-1521528-supplementary_QZ_TM.pdf]

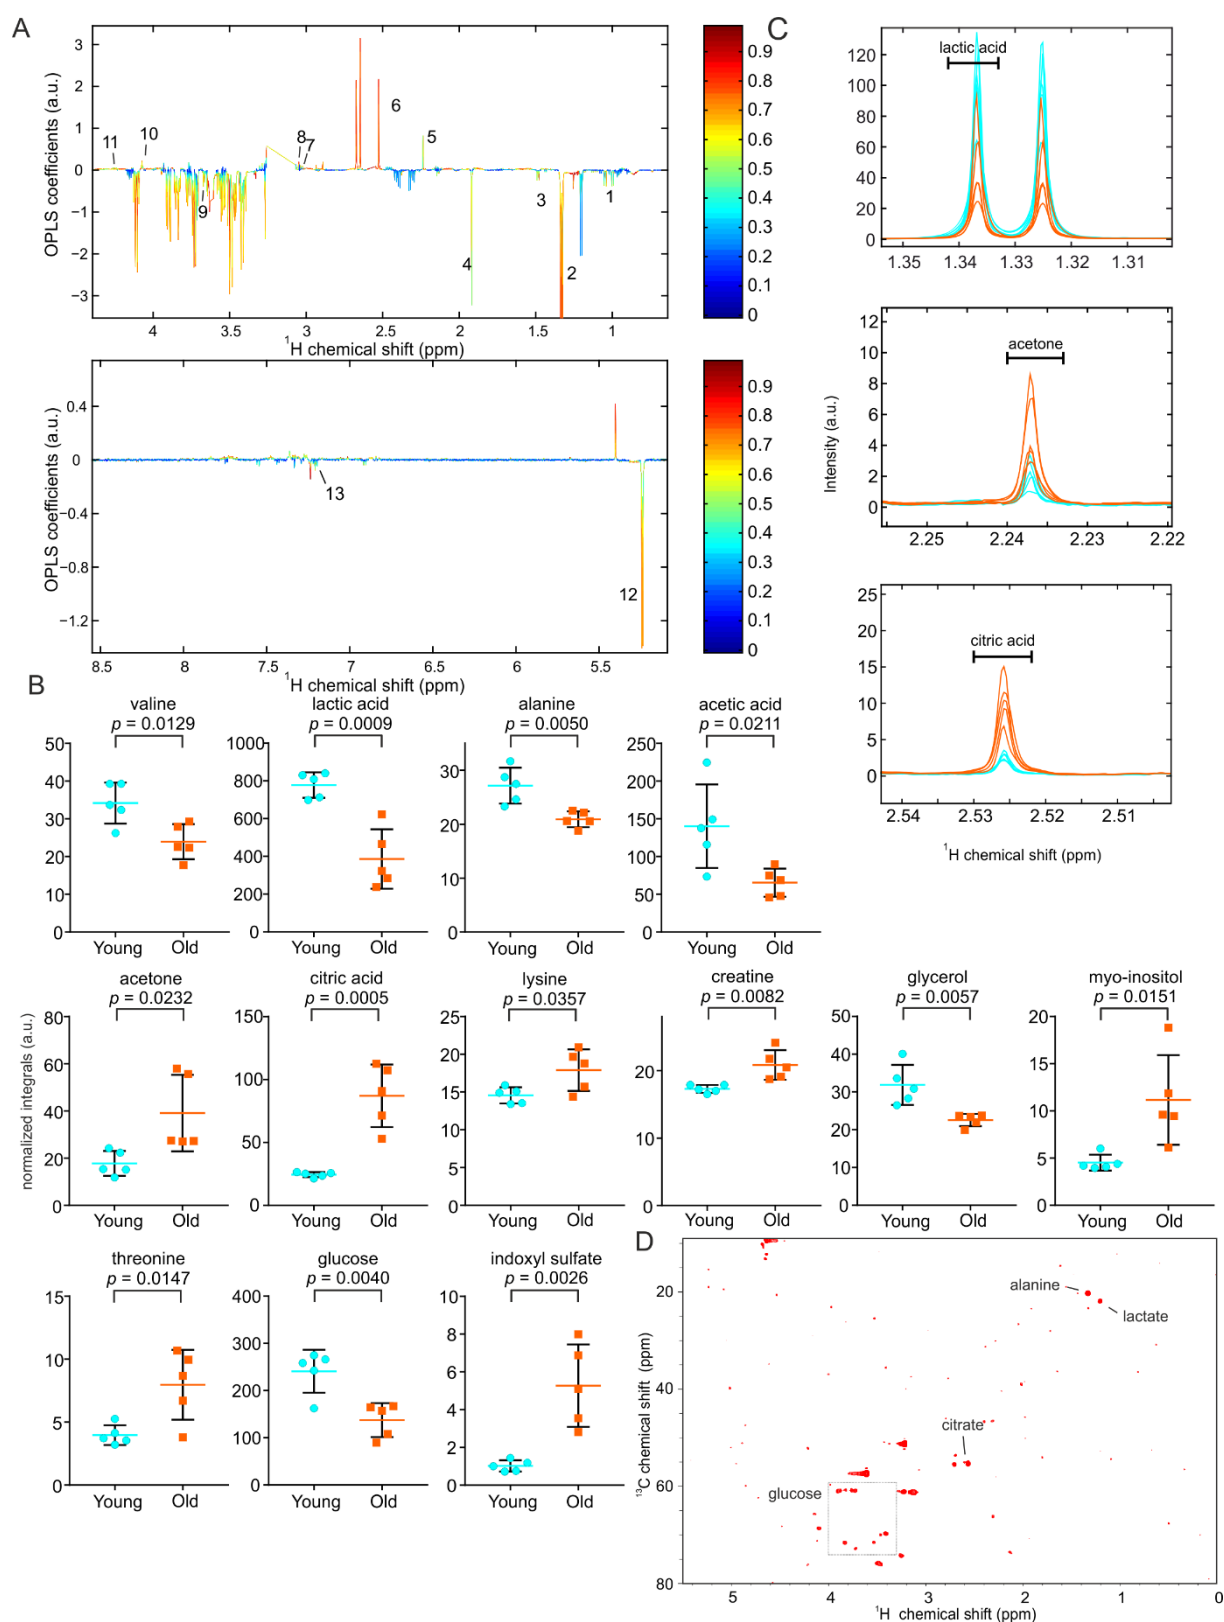

**Supplementary Figure S1.** (A) Reduced spectra based on normalized 1D  $^1\text{H}$  NMR spectra of plasma samples showing metabolites significantly changed in levels. The numbers correspond to 1 valine, 2 lactic acid, 3 alanine, 4 acetic acid, 5 acetone, 6 citric acid, 7 lysine, 8 creatine, 9 glycerol, 10 myo-inositol, 11 threonine, 12 glucose, 13 indoxyl sulfate. (B) Plot of the quantifications of corresponding up- and down-regulated metabolites in (A), including means and standard deviations (SD) obtained from Student's t-test. All plotted metabolites are with  $p < 0.05$ . (C) Overlay of  $^1\text{H}$ -NMR spectra of significantly up- and down-regulated metabolites. In each overlay, the 10 curves belong to the spectra

corresponding to the 10 plasma samples after normalization. Spectra of samples from young (9-10 weeks old) mice are shown in cyan, and from aged (96-104 weeks) mice are shown in orange. Areas delimited by black bars are integrated areas, and correspond to selected metabolites shown in (B). (D)  $^1\text{H}$ - $^{13}\text{C}$  HSQC NMR spectrum for one plasma sample from a young mouse. Selected metabolites are annotated.

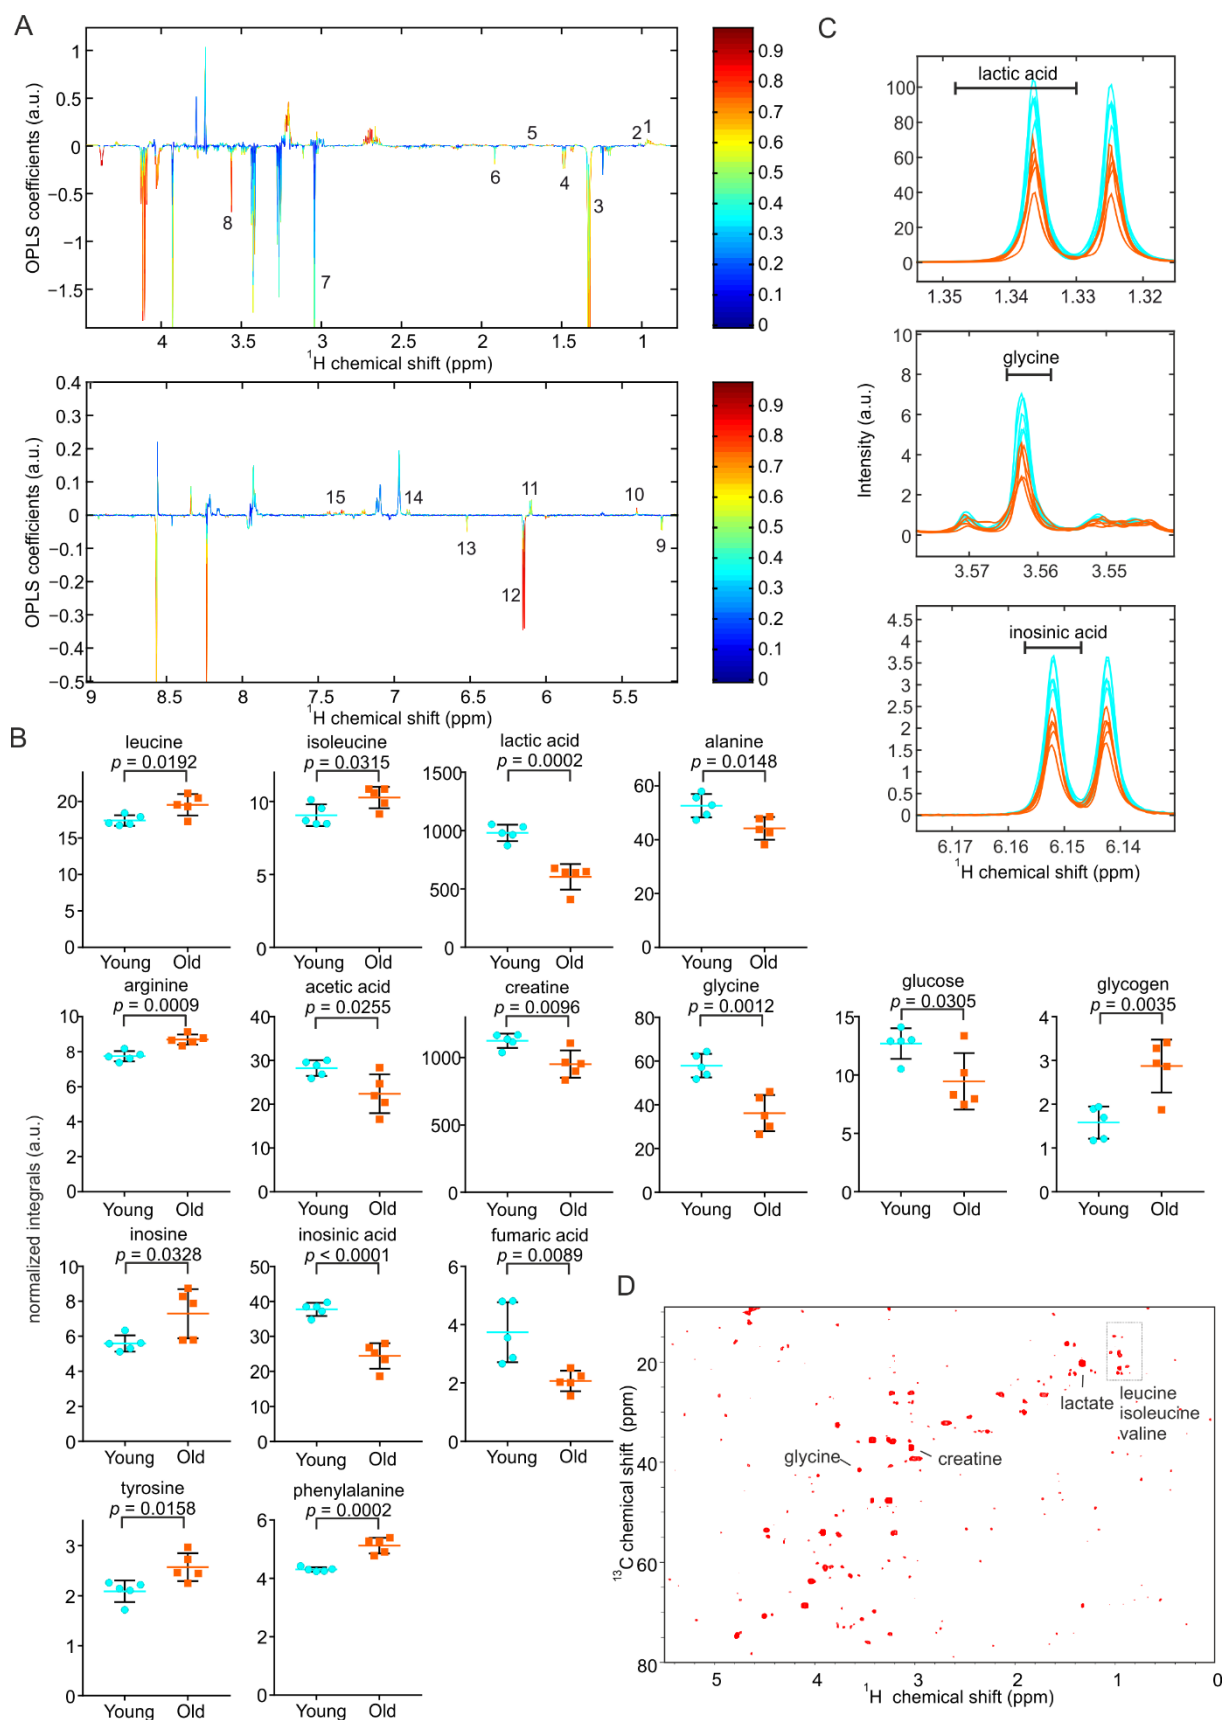

**Supplementary Figure S2.** (A) Reduced spectra based on normalized 1D  $^1\text{H}$  NMR spectra of skeletal muscle samples showing metabolites significantly changed in levels. The numbers correspond to 1 leucine, 2 isoleucine, 3 lactic acid, 4 alanine, 5 arginine, 6 acetic acid, 7 creatine, 8 glycine, 9 glucose, 10 glycogen, 11 inosine, 12 inosinic acid, 13 fumaric acid, 14 tyrosine, 15 phenylalanine. (B) Plot of the

quantifications of corresponding up- and down- regulated metabolites in (A), including means and standard deviations (SD) obtained from Student's t-test. All plotted metabolites are with  $p < 0.05$ . (C) Overlay of  $^1\text{H}$ -NMR spectra of significantly up- and down- regulated metabolites. In each overlay, the 10 curves belong to the spectra corresponding to the 10 skeletal muscle samples after normalization. Spectra of samples from young (9-10 weeks old) mice are in shown cyan, and from aged (96-104 weeks) mice are shown in orange. Areas delimited by black bars are integrated areas, and correspond to selected metabolites shown in (B). (D)  $^1\text{H}$ - $^{13}\text{C}$  HSQC NMR spectrum for one plasma sample from an old mouse. Selected metabolites are annotated.

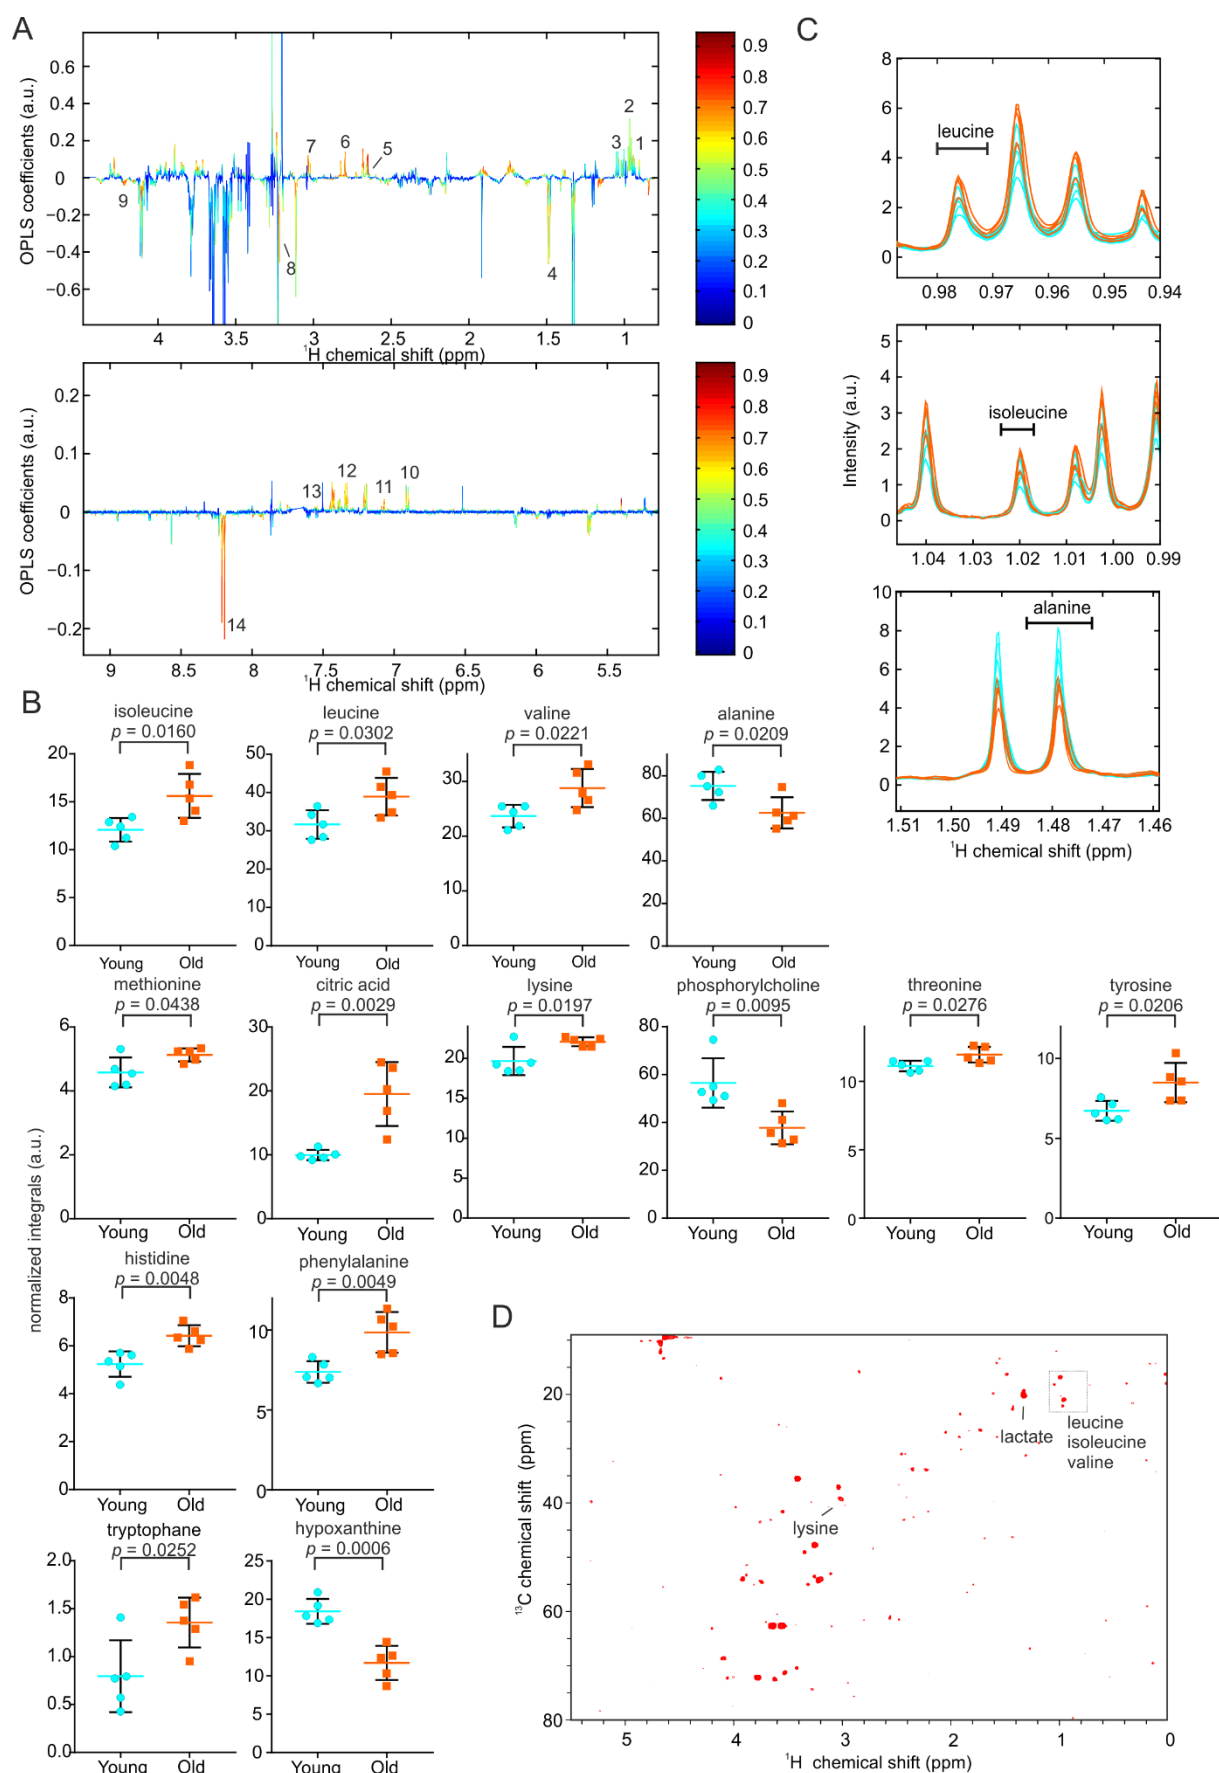

**Supplementary Figure S3.** (A) Reduced spectra based on normalized 1D  $^1\text{H}$  NMR spectra of BAT samples showing metabolites significantly changed in levels. The numbers correspond to 1 isoleucine, 2 leucine, 3 valine, 4 alanine, 5 methionine, 6 citric acid, 7 lysine, 8 phosphorylcholine, 9 threonine, 10 tyrosine,

11 histidine, 12 phenylalanine, 13 tryptophane, 14 hypoxanthine. (B) Plot of the quantifications of corresponding up- and down- regulated metabolites in (A), including means and standard deviations (SD) obtained from Student's t-test. All plotted metabolites are with  $p < 0.05$ . (C) Overlay of  $^1\text{H}$ -NMR spectra of significantly up- and down- regulated metabolites. In each overlap, the 10 curves belong to the spectra corresponding to the 10 BAT samples after normalization. Spectra of samples from young (9-10 weeks old) mice are shown in cyan, and from aged (96-104 weeks) mice are shown in orange. Areas delimited by black bars are integrated area, and correspond to selected metabolites shown in (B). (D)  $^1\text{H}$ - $^{13}\text{C}$  HSQC NMR spectrum for one BAT sample from an old mouse. Selected metabolites are annotated.

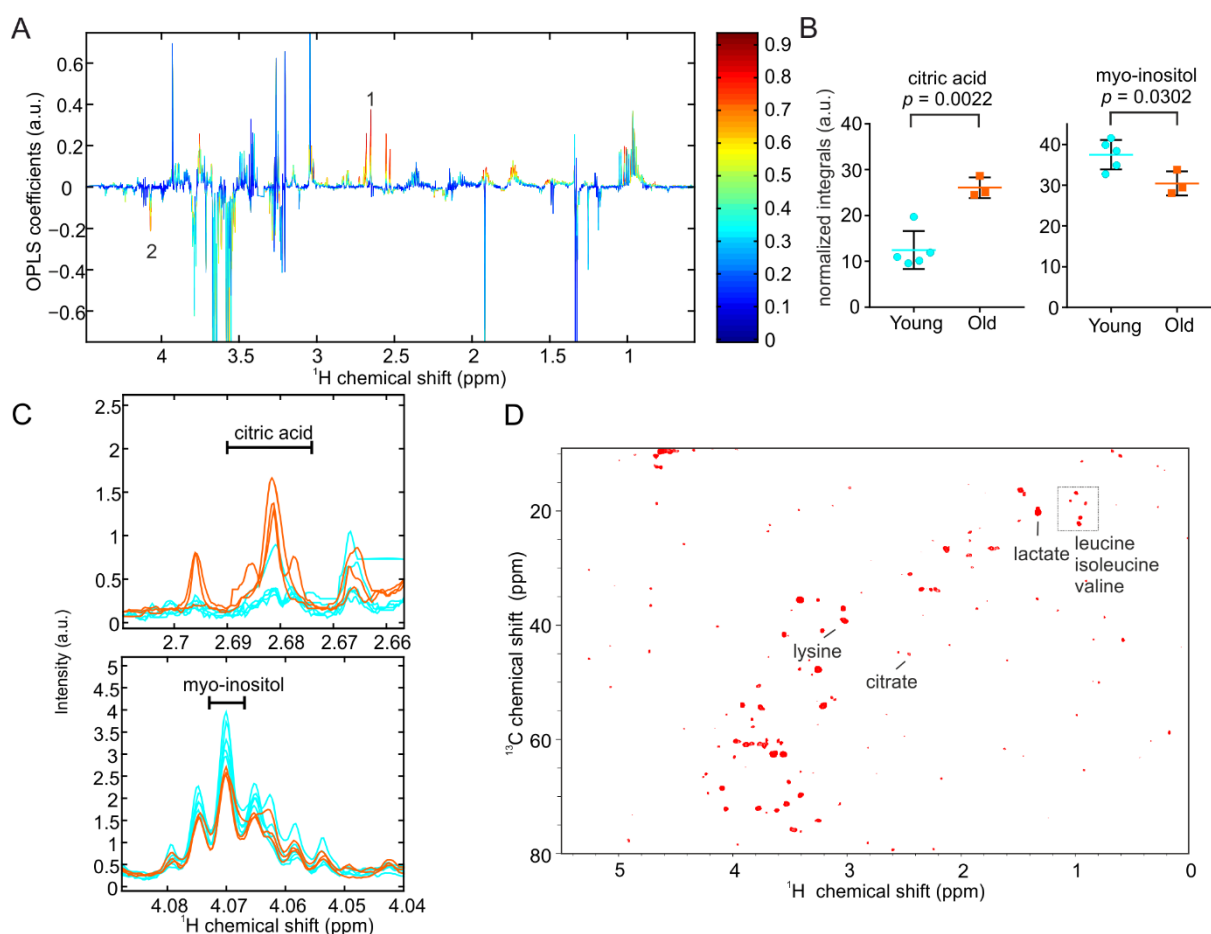

**Supplementary Figure S4.** (A) Reduced spectra based on normalized 1D  $^1\text{H}$  NMR spectra of WAT samples showing metabolites significantly changed in levels. The numbers correspond to 1 citric acid, 2 myo-inositol. (B) Plot of the quantifications of corresponding up- and down- regulated metabolites in (A), including means and SDs obtained from Student's t-test. All plotted metabolites are with  $p < 0.05$ . (C) Overlay of  $^1\text{H}$ -NMR spectra of significantly up- and down- regulated metabolites. In each overlay, the 8 curves belong to the spectra corresponding to the 8 WAT samples after normalization. Spectra of samples from young (9-10 weeks old) mice are shown in cyan, and from aged (96-104 weeks) mice are shown in orange. Areas delimited by black bars are integrated areas and correspond to metabolites shown in (B). (D)  $^1\text{H}$ - $^{13}\text{C}$  HSQC NMR spectrum for one WAT sample from a young mouse. Selected metabolites are annotated.

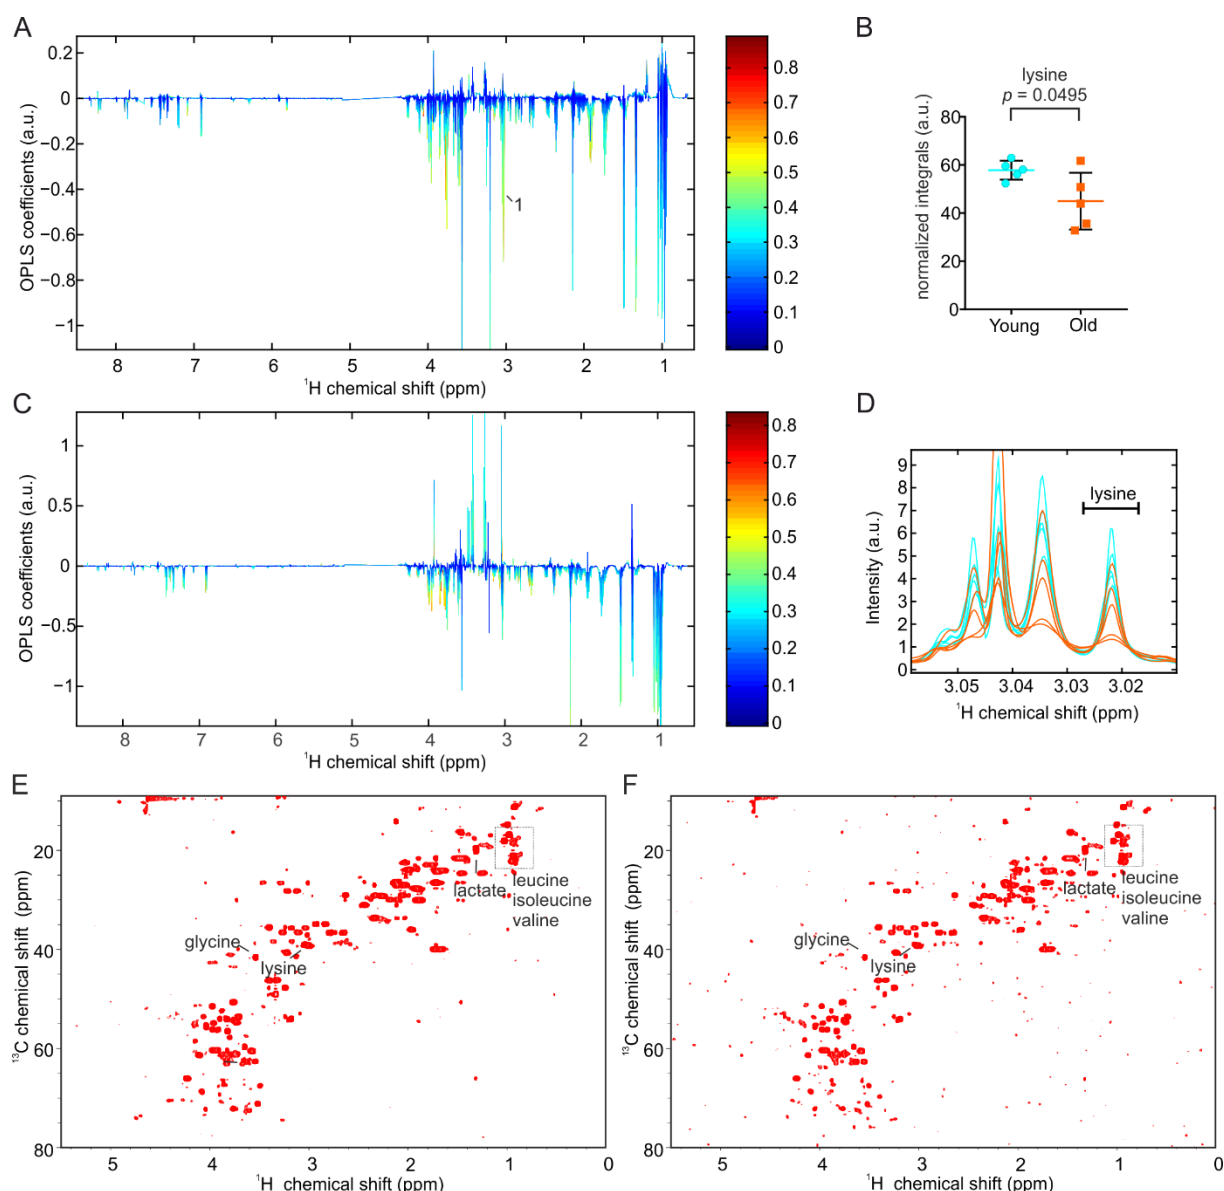

**Supplementary Figure S5.** (A) Reduced spectra based on normalized 1D  $^1\text{H}$  NMR spectra of duodenum samples showing alteration of metabolites in levels. The numbers correspond to 1 lysine. (B) Plot of the quantifications of corresponding up- and down-regulated metabolites in (A), including means and SDs obtained from Student's t-test. All plotted metabolites are with  $p < 0.05$ . (C) Reduced spectra based on normalized 1D  $^1\text{H}$  NMR spectra of jejunum samples showing alteration of metabolites in levels. (D) Overlay of  $^1\text{H}$ -NMR spectra of lysine from duodenum. All 10 curves belong to the spectra corresponding to the 10 duodenum samples after normalization. Spectra of samples from young (9-10 weeks old) mice are shown in cyan, and from aged (96-104 weeks) mice are shown in orange. The area delimited by a black bar indicates the integrated areas and correspond to lysine shown in (B). (E)  $^1\text{H}$ - $^{13}\text{C}$  HSQC NMR spectrum for one duodenum sample from an old mouse. (F)  $^1\text{H}$ - $^{13}\text{C}$  HSQC NMR spectrum for one jejunum sample from an old mouse. Selected metabolites are annotated.

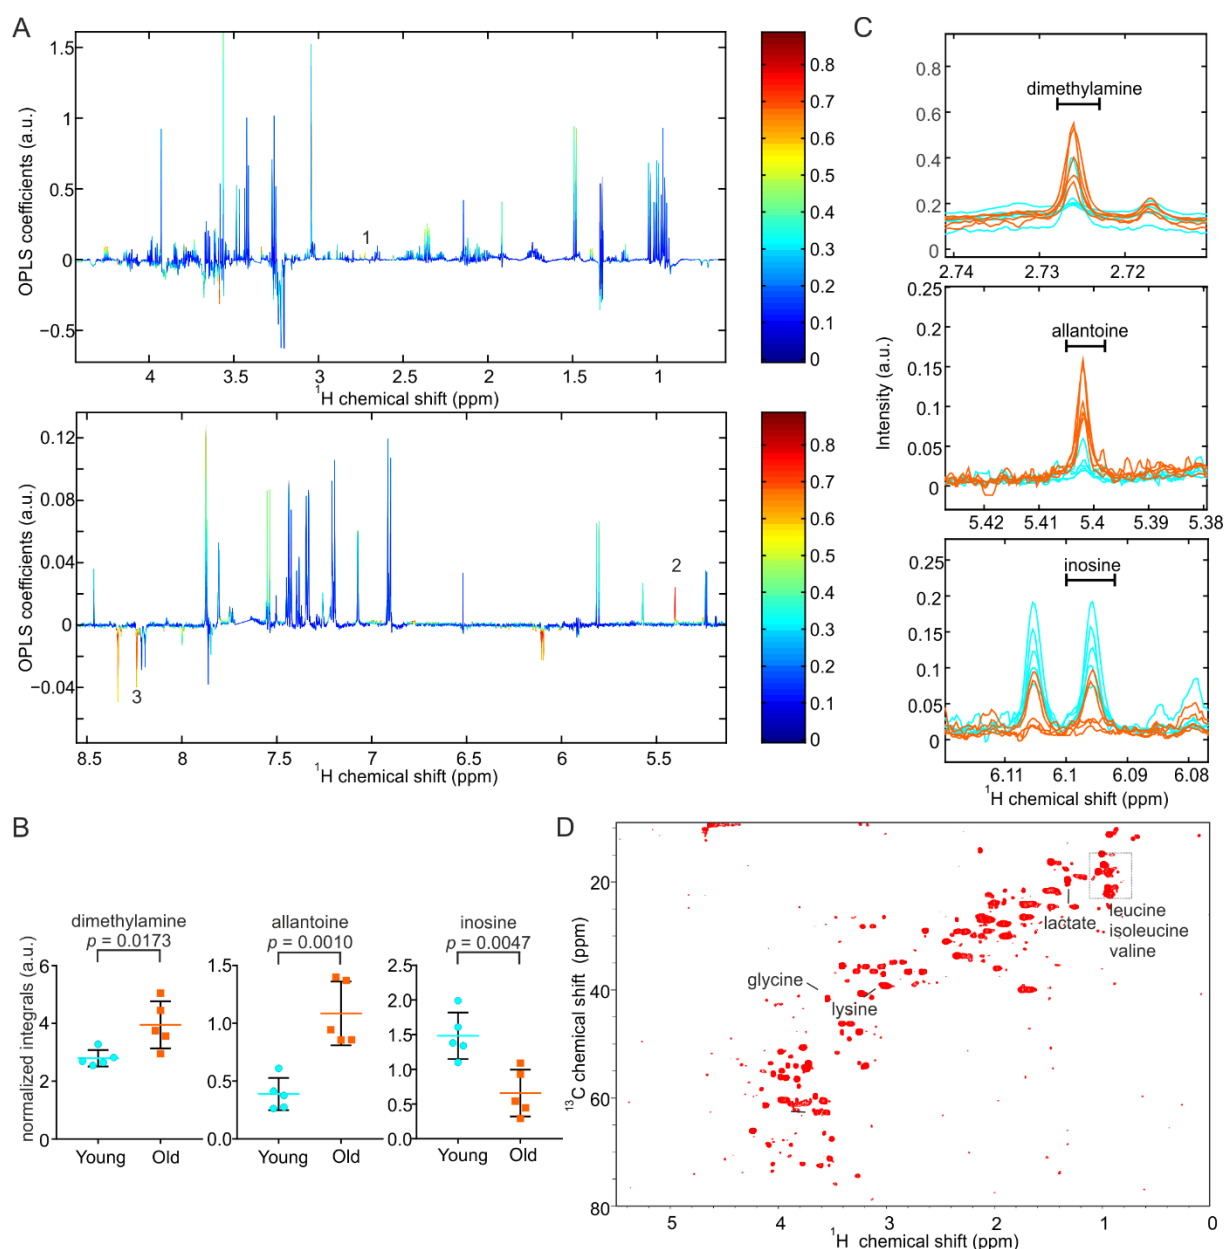

**Supplementary Figure S6.** (A) Reduced spectra based on normalized 1D  $^1\text{H}$  NMR spectra of ileum samples showing alteration of metabolites in levels. The numbers correspond to 1 dimethylamine, 2 allantoine, 3 inosine. (B) Plot of the quantifications of corresponding up- and down-regulated metabolites in (A), including means and SDs obtained from Student's t-test. All plotted metabolites are with  $p < 0.05$ . (C) Overlay of  $^1\text{H}$ -NMR spectra of significantly up- and down-regulated metabolites. In each overlay, the 10 curves belong to the spectra corresponding to the 10 ileum samples after normalization. Spectra of samples from young (9-10 weeks old) mice are colored in cyan, and from aged (96-104 weeks) mice are colored in orange. Areas delimited by black bars are integrated areas, corresponding to metabolites shown in (B). (D)  $^1\text{H}$ - $^{13}\text{C}$  HSQC NMR spectrum for one ileum sample from an old mouse. Selected metabolites are annotated.
